# Supplementary material
Source: PubMed Central journal article supplement (PMC4996774)
Supplement: NIHMS757538-supplement-Supp_Material.pdf [file NIHMS757538-supplement-Supp_Material.pdf]

**Web-based Supplementary Materials for “A New Flexible Dependence  
Measure for Semi-competing Risks”**

**Jing Yang and Limin Peng\***

Department of Biostatistics and Bioinformatics, Emory University, Atlanta, Georgia, U.S.A.

\**email*: lpeng@sph.emory.edu

## Web Appendix A: Theoretical Proofs and Arguments

Define

$$\mathbf{S}_n(\mathbf{b}, \tau, t_0) = n^{-1/2} \sum_{i=1}^n \frac{I(L_i^* \leq t_0)I(Y_i^* > t_0)\eta_i^*}{\hat{G}(Y_i^* - L_i^*)} \mathbf{A}_i^*(t_0) \{I[\log(Y_i^* - t_0) \leq \mathbf{A}_i^{*T}(t_0)\mathbf{b}] - \tau\},$$

$$\mathbf{S}_n^G(\mathbf{b}, \tau, t_0) = n^{-1/2} \sum_{i=1}^n \frac{I(L_i^* \leq t_0)I(Y_i^* > t_0)\eta_i^*}{G(Y_i^* - L_i^*)} \mathbf{A}_i^*(t_0) \{I[\log(Y_i^* - t_0) \leq \mathbf{A}_i^{*T}(t_0)\mathbf{b}] - \tau\},$$

$$\begin{aligned} \boldsymbol{\mu}(\mathbf{b}, \tau, t_0) &= n^{-1/2} E\{\mathbf{S}_n^G(\mathbf{b}, \tau, t_0)\} \\ &= c(t_0) E\{I(T_2 > t_0) \tilde{\mathbf{A}}(t_0) \{I[\log(T_2 - t_0) \leq \tilde{\mathbf{A}}^T(t_0)\mathbf{b}] - \tau\}\} \\ &= c(t_0) E\{\tilde{\mathbf{A}}(t_0) [P(T_2 > t_0, \log(T_2 - t_0) \leq \tilde{\mathbf{A}}^T(t_0)\mathbf{b} | \tilde{\mathbf{A}}^T(t_0)) - \tau P(T_2 > t_0 | \tilde{\mathbf{A}}(t_0))]\} \\ &= c(t_0) E\{\tilde{\mathbf{A}}(t_0) [P(T_2 \leq t_0 + \exp(\tilde{\mathbf{A}}^T(t_0)\mathbf{b}) | \tilde{\mathbf{A}}(t_0)) - P(T_2 \leq t_0 | \tilde{\mathbf{A}}(t_0)) - \tau P(T_2 > t_0 | \tilde{\mathbf{A}}(t_0))]\}. \end{aligned}$$

For brevity, we use  $\sup_{\mathbf{b}}$ ,  $\sup_{\tau}$  and  $\sup_{t_0}$  to denote supremum taken over  $\mathbf{b} \in R^2$ ,  $\tau \in [\tau_L, \tau_U]$  and  $t_0 \in [t_L, t_U]$ , respectively.

### 1.1 Proof for $E\{\mathbf{S}_n^G(\boldsymbol{\beta}_0(\tau, t_0), \tau, t_0)\} = 0$

Given the independence between  $D$  and  $(T_1, T_2, L)$ , it is easy to show that the distributions of  $D$  and  $D^*$  are equivalent, and  $D^*$  is also independent of  $(T_1^*, T_2^*, L^*)$ . Note that  $I(Y^* > t_0)\eta^* \mathbf{A}^*(t_0) = I(T_2^* > t_0, T_2^* < C^*) \tilde{\mathbf{A}}^*(t_0)$ . Thus, we have

$$\begin{aligned} & E\left\{ \frac{I(L^* \leq t_0)I(Y^* > t_0)\eta^*}{G(Y^* - L^*)} \mathbf{A}^*(t_0) \{I[\log(Y^* - t_0) \leq \mathbf{A}^{*T}(t_0)\mathbf{b}] - \tau\} \right\} \\ &= E\left\{ \frac{I(L^* \leq t_0)I(T_2^* > t_0, T_2^* < C^*)}{G(T_2^* - L^*)} \tilde{\mathbf{A}}^*(t_0) \{I[\log(T_2^* - t_0) \leq \tilde{\mathbf{A}}^{*T}(t_0)\mathbf{b}] - \tau\} \right\} \\ &= E\left\{ \frac{I(L^* \leq t_0)I(T_2^* > t_0) \tilde{\mathbf{A}}^*(t_0) \{I[\log(T_2^* - t_0) \leq \tilde{\mathbf{A}}^{*T}(t_0)\mathbf{b}] - \tau\}}{G(T_2^* - L^*)} E[I(T_2^* - L^* < D^*) | T_1^*, T_2^*, L^*] \right\} \\ &= E\left\{ I(L^* \leq t_0)I(T_2^* > t_0) \tilde{\mathbf{A}}^*(t_0) \{I[\log(T_2^* - t_0) \leq \tilde{\mathbf{A}}^{*T}(t_0)\mathbf{b}] - \tau\} \times \frac{G(T_2^* - L^*)}{G(T_2^* - L^*)} \right\} \\ &= c(t_0) E\left\{ I(T_2 > t_0) \tilde{\mathbf{A}}(t_0) \{I[\log(T_2 - t_0) \leq \tilde{\mathbf{A}}^T(t_0)\mathbf{b}] - \tau\} \right\} \end{aligned}$$

and

$$\begin{aligned}
& E \left\{ I(T_2 > t_0) \tilde{\mathbf{A}}(t_0) I[\log(T_2 - t_0) \leq \tilde{\mathbf{A}}^T(t_0) \mathbf{b}] \right\} \\
&= E \left\{ \tilde{\mathbf{A}}(t_0) P[T_2 > t_0, \log(T_2 - t_0) \leq \tilde{\mathbf{A}}^T(t_0) \mathbf{b} | \tilde{\mathbf{A}}^T(t_0)] \right\} \\
&= E \left\{ \tilde{\mathbf{A}}(t_0) P[\log(T_2 - t_0) \leq \tilde{\mathbf{A}}^T(t_0) \mathbf{b} | T_2 > t_0, \tilde{\mathbf{A}}(t_0)] P[T_2 > t_0 | \tilde{\mathbf{A}}(t_0)] \right\} \\
&= \tau E \{ I(T_2 > t_0) \tilde{\mathbf{A}}(t_0) \},
\end{aligned}$$

where  $G(t) = P(D > t)$ ,  $\alpha = P(Y \geq L)$  and  $c(t_0) = P(L \leq t_0)/\alpha$ .

Therefore, we have  $E\{\mathbf{S}_n^G(\boldsymbol{\beta}_0(\tau, t_0), \tau, t_0)\} = 0$ .

### 1.2 Proof of Theorem 3.1

By condition C1, we have  $\sup_{t < \nu} |\hat{G}(t) - G(t)| = o(n^{-1/2+r})$ , a.s., for every  $r > 0$ . This implies that

$$\sup_{\mathbf{b}, \tau, t_0} \|n^{-1/2} \mathbf{S}_n(\mathbf{b}, \tau, t_0) - n^{-1/2} \mathbf{S}_n^G(\mathbf{b}, \tau, t_0)\| = o(n^{-1/2+r}), \quad a.s.$$

Define  $\mathcal{F} = \left\{ \frac{I(L_i^* \leq t_0) I(Y_i^* > t_0) \eta_i^*}{G(Y_i^* - L_i^*)} \mathbf{A}_i^*(t_0) \{I[\log(Y_i^* - t_0) \leq \mathbf{A}_i^{*T}(t_0) \mathbf{b}] - \tau\}, \mathbf{b} \in R^2, \tau \in [\tau_L, \tau_U], t_0 \in [t_L, t_U] \right\}$ . The function class  $\mathcal{F}$  is Donsker and thus Glivenko-Cantelli because the class indicator functions is Donsker and both  $\mathbf{A}_i^*(t_0)$  and  $G(Y_i^* - L_i^*)$  is uniformly bounded (Van der Vaart and Wellner, 1996). Then  $\sup_{\mathbf{b}, \tau, t_0} \|n^{-1/2} \mathbf{S}_n^G(\mathbf{b}, \tau, t_0) - \boldsymbol{\mu}(\mathbf{b}, \tau, t_0)\| = o(1)$ , a.s. by the Glivenko-Cantelli Theorem and thus  $\sup_{\mathbf{b}, \tau, t_0} \|n^{-1/2} \mathbf{S}_n(\mathbf{b}, \tau, t_0) - \boldsymbol{\mu}(\mathbf{b}, \tau, t_0)\| = o(1)$ , a.s.. This, coupled with the fact that  $\boldsymbol{\mu}\{\boldsymbol{\beta}_0(\tau, t_0), \tau, t_0\} = 0$  and  $n^{-1/2} \mathbf{S}_n(\hat{\boldsymbol{\beta}}(\tau, t_0), \tau, t_0) = o(1)$ , a.s., implies that

$$\sup_{\tau, t_0} \|\boldsymbol{\mu}\{\hat{\boldsymbol{\beta}}(\tau, t_0), \tau, t_0\} - \boldsymbol{\mu}\{\boldsymbol{\beta}_0(\tau, t_0), \tau, t_0\}\| = o(1), \quad a.s.$$

Following the same line of Peng and Fine (2009), we can show that Condition C3 and the monotonicity of  $\boldsymbol{\mu}(\mathbf{b}, \tau, t_0)$  in  $\mathbf{b}$  imply

$$\inf_{\mathbf{b} \notin B(\rho_0), \tau, t_0} \|\boldsymbol{\mu}\{\mathbf{b}, \tau, t_0\} - \boldsymbol{\mu}\{\boldsymbol{\beta}_0(\tau, t_0), \tau, t_0\}\| \geq c_0 \rho_0.$$

Consequently,  $\{\hat{\boldsymbol{\beta}}(\tau, t_0) : \tau \in [\tau_L, \tau_U], t_0 \in [t_L, t_U]\} \subseteq B(\rho_0)$  for large enough  $n$  with probability 1. Applying Taylor expansion to  $\boldsymbol{\mu}\{\hat{\boldsymbol{\beta}}(\tau, t_0), \tau, t_0\}$  around  $\boldsymbol{\beta}_0(\tau, t_0)$  gives

$$\begin{aligned} & \sup_{\tau, t_0} \|\hat{\boldsymbol{\beta}}(\tau, t_0) - \boldsymbol{\beta}_0(\tau, t_0)\| \\ &= \sup_{\tau, t_0} \|H\{\check{\boldsymbol{\beta}}(\tau, t_0), t_0\}^{-1} [\boldsymbol{\mu}\{\hat{\boldsymbol{\beta}}(\tau, t_0), \tau, t_0\} - \boldsymbol{\mu}\{\boldsymbol{\beta}_0(\tau, t_0), \tau, t_0\}]\| \\ &\leq c_0^{-1} \sup_{\tau, t_0} \|\boldsymbol{\mu}\{\hat{\boldsymbol{\beta}}(\tau, t_0), \tau, t_0\} - \boldsymbol{\mu}\{\boldsymbol{\beta}_0(\tau, t_0), \tau, t_0\}\| \end{aligned}$$

where  $\check{\boldsymbol{\beta}}(\tau, t_0)$  lies between  $\hat{\boldsymbol{\beta}}(\tau, t_0)$  and  $\boldsymbol{\beta}_0(\tau, t_0)$  and is therefore within  $B(\rho_0)$  for large enough  $n$ . The uniform consistency of  $\hat{\boldsymbol{\beta}}(\tau, t_0)$  to  $\boldsymbol{\beta}_0(\tau, t_0)$  for  $\tau \in [\tau_L, \tau_U], t_0 \in [t_L, t_U]$  then follows.

### 1.3 Proof of Theorem 3.2

From Pepe (1991),  $\sup_{t \in [0, \nu]} \|n^{1/2}[\hat{G}(t) - G(t)] - n^{-1/2} \sum_{i=1}^n G(t) \int_0^t y(s)^{-1} dM_i^G(s)\| \rightarrow 0$ . Using similar empirical process arguments for  $\mathcal{F}$ , we can show that  $n^{-1} \sum_{i=1}^n \mathbf{A}_i^*(t_0) Y_i(t) I(L_i^* \leq t_0) I(Y_i^* > t_0) \eta_i^* \{I[\log(Y_i^* - t_0) \leq \mathbf{A}_i^{*T}(t_0) \mathbf{b}] - \tau\} G(Y_i^* - L_i^*)^{-1}$  converges to  $\mathbf{w}(\mathbf{b}, \tau, t_0, t)$  uniformly in  $\mathbf{b}, \tau, t_0$  and  $t$ .

Let  $\approx$  denote asymptotic equivalence uniformly in  $\tau \in [\tau_L, \tau_U]$  and  $t_0 \in [t_L, t_U]$ . Simple

algebraic manipulations show that

$$\begin{aligned}
& \mathbf{S}_n\{\boldsymbol{\beta}_0(\tau, t_0), \tau, t_0\} \\
&= \mathbf{S}_n^G\{\boldsymbol{\beta}_0(\tau, t_0), \tau, t_0\} + [\mathbf{S}_n\{\boldsymbol{\beta}_0(\tau, t_0), \tau, t_0\} - \mathbf{S}_n^G\{\boldsymbol{\beta}_0(\tau, t_0), \tau, t_0\}] \\
&= n^{-1/2} \sum_{i=1}^n \boldsymbol{\xi}_{1,i}(\tau, t_0) - n^{-1/2} \sum_{i=1}^n \mathbf{A}_i^*(t_0) \frac{\hat{G}(Y_i^* - L_i^*) - G(Y_i^* - L_i^*)}{\hat{G}(Y_i^* - L_i^*)G(Y_i^* - L_i^*)} I(L_i^* \leq t_0) I(Y_i^* > t_0) \eta_i^* \\
&\quad \times \{I[\log(Y_i^* - t_0) \leq \mathbf{A}_i^{*T}(t_0)\boldsymbol{\beta}_0(\tau, t_0)] - \tau\} \\
&\approx n^{-1/2} \sum_{i=1}^n \boldsymbol{\xi}_{1,i}(\tau, t_0) - n^{-1} \sum_{i=1}^n \mathbf{A}_i^*(t_0) \frac{n^{-1/2} \sum_{j=1}^n \int_0^\infty Y_j(s) y(s)^{-1} dM_j^G(s)}{G(Y_i^* - L_i^*)} I(L_i^* \leq t_0) I(Y_i^* > t_0) \eta_i^* \\
&\quad \times \{I[\log(Y_i^* - t_0) \leq \mathbf{A}_i^{*T}(t_0)\boldsymbol{\beta}_0(\tau, t_0)] - \tau\} \\
&= n^{-1/2} \sum_{i=1}^n \boldsymbol{\xi}_{1,i}(\tau, t_0) \\
&\quad - n^{-1/2} \sum_{i=1}^n \int_0^\infty \left\{ \frac{\sum_{j=1}^n \mathbf{A}_j^*(t_0) Y_j(s) I(L_j^* \leq t_0) I(Y_j^* > t_0) \eta_j^* \{I[\log(Y_j^* - t_0) \leq \mathbf{A}_j^{*T}(t_0)\boldsymbol{\beta}_0(\tau, t_0)] - \tau\}}{nG(Y_j^* - L_j^*)} \right\} \\
&\quad \times \frac{dM_i^G(s)}{y(s)} \\
&\approx n^{-1/2} \sum_{i=1}^n \boldsymbol{\xi}_{1,i}(\tau, t_0) - n^{-1/2} \sum_{i=1}^n \int_0^\infty \mathbf{w}(\boldsymbol{\beta}_0(\tau, t_0), \tau, t_0, s) \frac{dM_i^G(s)}{y(s)} \\
&= n^{-1/2} \sum_{i=1}^n \{\boldsymbol{\xi}_{1,i}(\tau, t_0) - \boldsymbol{\xi}_{2,i}(\tau, t_0)\}.
\end{aligned}$$

We claim that  $\mathcal{F}^* = \{\boldsymbol{\xi}_{1,i}(\tau, t_0), \tau \in [\tau_L, \tau_U], t_0 \in [t_L, t_U]\}$  and  $\mathcal{F}^{**} = \{\boldsymbol{\xi}_{2,i}(\tau, t_0), \tau \in [\tau_L, \tau_U], t_0 \in [t_L, t_U]\}$  are Donsker classes by using similar arguments of Peng and Fine (2009). As a result of the Donsker theorem,  $\mathbf{S}_n\{\boldsymbol{\beta}_0(\tau, t_0), \tau, t_0\}$  converges weakly to a mean zero Gaussian process with covariance matrix  $\boldsymbol{\Sigma}(\tau', t'_0, \tau, t_0) = E\{\boldsymbol{\zeta}_1(\tau', t'_0)\boldsymbol{\zeta}_1(\tau, t_0)^T\}$ , where  $\boldsymbol{\zeta}_i(\tau, t_0) = \boldsymbol{\xi}_{1,i}(\tau, t_0) - \boldsymbol{\xi}_{2,i}(\tau, t_0)$ ,  $i = 1, \dots, n$ .

Next, we establish the asymptotic linearity of  $\mathbf{S}_n^G(\mathbf{b}, \tau, t_0)$  in the vicinity of  $\mathbf{b} = \boldsymbol{\beta}_0(\tau, t_0)$ ; that is, for any positive sequence of  $\{d_n\}_{n=1}^\infty$  such that  $d_n \rightarrow 0$ ,

$$\sup_{\mathbf{b}, \mathbf{b}' \in B(\rho_0), \|\mathbf{b} - \mathbf{b}'\| \leq d_n, t_0} \|\{\mathbf{S}_n^G(\mathbf{b}, \tau, t_0) - \mathbf{S}_n^G(\mathbf{b}', \tau, t_0)\} - n^{1/2}\{\boldsymbol{\mu}(\mathbf{b}, \tau, t_0) - \boldsymbol{\mu}(\mathbf{b}', \tau, t_0)\}\| = o(1), a.s. \quad (1)$$

Its proof greatly resembles the lines of Alexander (1984) and Lai and Ying (1988). The key

is to show

$$\begin{aligned} & \text{Var}(I(L_i^* \leq t_0)I(Y_i^* > t_0)\eta_i^*G(Y_i^* - L_i^*)^{-1}\mathbf{A}_i^*(t_0)\{I[\log(Y_i^* - t_0) \leq \mathbf{A}_i^{*T}(t_0)\mathbf{b}] \\ & - I[\log(Y_i^* - t_0) \leq \mathbf{A}_i^{*T}(t_0)\mathbf{b}']\}) \leq G_0\|\mathbf{b} - \mathbf{b}'\|. \end{aligned}$$

This follows from the uniform boundedness of  $f(t|\tilde{\mathbf{A}}(t_0))$  and boundedness of  $B(\rho_0)$  and  $G(t)$ .

It follows from (1) that

$$\begin{aligned} & \mathbf{S}_n(\hat{\boldsymbol{\beta}}(\tau, t_0), \tau, t_0) - \mathbf{S}_n(\boldsymbol{\beta}_0(\tau, t_0), \tau, t_0) \\ & = n^{-1/2} \sum_{i=1}^n I(L_i^* \leq t_0)I(Y_i^* > t_0)\eta_i^*G(Y_i^* - L_i^*)^{-1}\mathbf{A}_i^*(t_0)\{I[\log(Y_i^* - t_0) \leq \mathbf{A}_i^{*T}(t_0)\hat{\boldsymbol{\beta}}(\tau, t_0)] \\ & - I[\log(Y_i^* - t_0) \leq \mathbf{A}_i^{*T}(t_0)\boldsymbol{\beta}_0(\tau, t_0)]\} \\ & + n^{-1/2} \sum_{i=1}^n I(L_i^* \leq t_0)I(Y_i^* > t_0)\eta_i^*\mathbf{A}_i^*(t_0)\{I[\log(Y_i^* - t_0) \leq \mathbf{A}_i^{*T}(t_0)\hat{\boldsymbol{\beta}}(\tau, t_0)] \\ & - I[\log(Y_i^* - t_0) \leq \mathbf{A}_i^{*T}(t_0)\boldsymbol{\beta}_0(\tau, t_0)]\}\{\hat{G}(Y_i^* - L_i^*)^{-1} - G(Y_i^* - L_i^*)^{-1}\} \\ & \approx n^{1/2}[\boldsymbol{\mu}\{\hat{\boldsymbol{\beta}}(\tau, t_0), \tau, t_0\} - \boldsymbol{\mu}\{\boldsymbol{\beta}_0(\tau, t_0), \tau, t_0\}]. \end{aligned}$$

Taylor expansion of  $\boldsymbol{\mu}(\mathbf{b})$  around  $\mathbf{b} = \boldsymbol{\beta}_0(\tau, t_0)$ , along with the fact that  $\hat{\boldsymbol{\beta}}_0(\tau, t_0)$  uniformly converges to  $\boldsymbol{\beta}_0(\tau, t_0)$ , gives that

$$\mathbf{S}_n(\hat{\boldsymbol{\beta}}(\tau, t_0), \tau, t_0) - \mathbf{S}_n(\boldsymbol{\beta}_0(\tau, t_0), \tau, t_0) \approx \mathbf{H}\{\boldsymbol{\beta}_0(\tau, t_0), t_0\}n^{1/2}\{\hat{\boldsymbol{\beta}}(\tau, t_0) - \boldsymbol{\beta}_0(\tau, t_0)\}.$$

This implies

$$n^{1/2}\{\hat{\boldsymbol{\beta}}(\tau, t_0) - \boldsymbol{\beta}_0(\tau, t_0)\} \approx -\mathbf{H}\{\boldsymbol{\beta}_0(\tau, t_0), t_0\}^{-1}\mathbf{S}_n(\boldsymbol{\beta}_0(\tau, t_0), \tau, t_0)$$

and then  $n^{1/2}\{\hat{\boldsymbol{\beta}}(\tau, t_0) - \boldsymbol{\beta}_0(\tau, t_0)\}$  converges weakly to a mean zero Gaussian process with covariance matrix

$$\mathbf{H}\{\boldsymbol{\beta}_0(\tau', t'_0), t'_0\}^{-1}E\{\boldsymbol{\zeta}(\tau', t'_0)\boldsymbol{\zeta}(\tau, t_0)^T\}\mathbf{H}\{\boldsymbol{\beta}_0(\tau, t_0), t_0\}^{-T}.$$

#### 1.4 The justification for the proposed Covariance Estimate

Denote  $\mathbf{b}_{n,j}(\tau, t_0) = \mathbf{S}_n^{-1}\{\mathbf{e}_{n,j}(\tau, t_0), \tau, t_0\}$ ,  $j = 1, 2$ . It is implied from the proof of Theorem 3.1 that  $\{\mathbf{b}_{n,j}(\tau, t_0), \tau \in [\tau_L, \tau_U], t_0 \in [t_L, t_U]\}$  is within  $B(\rho_0)$  with probability 1 for large enough  $n$ , and thus  $\sup_{\tau, t_0} \|\mathbf{b}_{n,j}(\tau, t_0) - \boldsymbol{\beta}_0(\tau, t_0)\| \rightarrow 0$ , a.s.,  $j = 1, 2$ . Using arguments similar to proof of weak convergence, we can show that

$$\mathbf{S}_n(\mathbf{b}_{n,j}(\tau, t_0), \tau, t_0) - \mathbf{S}_n(\boldsymbol{\beta}_0(\tau, t_0), \tau, t_0) \approx \mathbf{H}\{\boldsymbol{\beta}_0(\tau, t_0), t_0\}n^{1/2}\{\mathbf{b}_{n,j}(\tau, t_0) - \boldsymbol{\beta}_0(\tau, t_0)\}.$$

The definitions of  $\mathbf{D}_n(\tau, t_0)$  and  $\mathbf{E}_n(\tau, t_0)$  imply  $\mathbf{H}^{-1}\{\boldsymbol{\beta}_0(\tau, t_0), t_0\} \approx \sqrt{n}\mathbf{D}_n(\tau, t_0)\mathbf{E}_n^{-1}(\tau, t_0)$ .

It follows immediately that

$$n\mathbf{D}_n(\tau', t'_0)\mathbf{E}_n^{-1}(\tau', t'_0)\hat{\boldsymbol{\Sigma}}(\tau', t'_0, \tau, t_0)\mathbf{E}_n^{-1}(\tau, t_0)\mathbf{D}_n^T(\tau, t_0)$$

is a consistent estimate for  $\boldsymbol{\Phi}(\tau', t'_0, \tau, t_0) = \mathbf{H}\{\boldsymbol{\beta}_0(\tau', t'_0), t'_0\}^{-1}\boldsymbol{\Sigma}(\tau', t'_0, \tau, t_0)\mathbf{H}\{\boldsymbol{\beta}_0(\tau, t_0), t_0\}^{-T}$ , which is the asymptotic covariance matrix of  $\sqrt{n}\{\hat{\boldsymbol{\beta}}(\tau, t_0) - \boldsymbol{\beta}_0(\tau, t_0)\}$ .

#### 1.5 The justification for the proposed estimating equation in Section 4

Recall that  $\mathbf{K}^*(t_0) = (1, I(X^* > t_0), \tilde{\mathbf{Z}}^{*T}, \tilde{\mathbf{Z}}^{*T}I(X^* > t_0))^T$  and the estimating equation is

$$\mathbf{S}_n(\mathbf{r}, \tau, t_0) = 0,$$

where

$$\mathbf{S}_n(\mathbf{r}, \tau, t_0) = n^{-1/2} \sum_{i=1}^n \frac{I(L_i^* \leq t_0)I(Y_i^* > t_0)\eta_i^*}{\hat{G}(Y_i^* - L_i^*)} \mathbf{K}_i^*(t_0) \{I[\log(Y_i^* - t_0) \leq \mathbf{K}_i^{*T}(t_0)\mathbf{r}] - \tau\}.$$

Similar to the one-sample case, we further define  $\tilde{\mathbf{K}}^*(t_0) = (1, I(T_1^* > t_0), \tilde{\mathbf{Z}}^{*T}, \tilde{\mathbf{Z}}^{*T}I(T_1^* > t_0))^T$  and  $\tilde{\mathbf{K}}(t_0) = (1, I(T_1 > t_0), \tilde{\mathbf{Z}}^T, \tilde{\mathbf{Z}}^T I(T_1 > t_0))^T$ . Denote

$$E \left\{ \frac{I(L^* \leq t_0)I(Y^* > t_0)\eta^*}{G(Y^* - L^*)} \mathbf{K}^*(t_0) \{I[\log(Y^* - t_0) \leq \mathbf{K}^{*T}(t_0)\mathbf{r}] - \tau\} \right\}$$

by (I). The key justification for the proposed estimating equation in Section 4 is to show (I) = 0.

First, it is easy to see that

$$(I) = E \left\{ \frac{I(L^* \leq t_0)I(T_2^* > t_0, T_2^* < C^*)}{G(T_2^* - L^*)} \tilde{\mathbf{K}}^*(t_0) \{I[\log(T_2^* - t_0) \leq \tilde{\mathbf{K}}^{*T}(t_0)\mathbf{r}] - \tau\} \right\}.$$

Note that  $\{L \leq Y\} \subseteq \{L \leq t_0, t_0 < T_2 \leq t_0 + u, T_2 < C, T_1 > t_0\}$ . This implies

$$f_{(L^*, C^*, T_1^*, T_2^*, \tilde{\mathbf{Z}}^*)}(l, c, t_1, t_2, \tilde{\mathbf{z}}) = \frac{1}{\alpha} f_{(L, C, T_1, T_2, \tilde{\mathbf{Z}}^*)}(l, c, t_1, t_2, \tilde{\mathbf{z}})$$

in the region of  $\{(l, c, t_1, t_2) : l \leq t_0, t_0 < t_2 \leq t_0 + u, t_2 < c, t_1 > t_0\}$ . Thus,

$$\begin{aligned} (I) &= \frac{1}{\alpha} E \left\{ \frac{I(L \leq t_0)I(T_2 > t_0, T_2 < C)}{G(T_2 - L)} \tilde{\mathbf{K}}(t_0) \{I[\log(T_2 - t_0) \leq \tilde{\mathbf{K}}^T(t_0)\mathbf{r}] - \tau\} \right\} \\ &= \frac{1}{\alpha} E \left\{ \frac{I(L \leq t_0)I(T_2 > t_0) \tilde{\mathbf{K}}(t_0) \{I[\log(T_2 - t_0) \leq \tilde{\mathbf{K}}^T(t_0)\mathbf{r}] - \tau\}}{G(T_2 - L)} E[I(T_2 - L < D) | T_1, T_2, L, \tilde{\mathbf{Z}}] \right\} \\ &= \frac{1}{\alpha} E \left\{ I(L \leq t_0)I(T_2 > t_0) \tilde{\mathbf{K}}(t_0) \{I[\log(T_2 - t_0) \leq \tilde{\mathbf{K}}^T(t_0)\mathbf{r}] - \tau\} \times \frac{G(T_2 - L)}{G(T_2 - L)} \right\} \\ &= \frac{1}{\alpha} E \left\{ I(L \leq t_0)I(T_2 > t_0) \tilde{\mathbf{K}}(t_0) \{I[\log(T_2 - t_0) \leq \tilde{\mathbf{K}}^T(t_0)\mathbf{r}] - \tau\} \right\}, \end{aligned}$$

where the third equality above uses the assumption of  $D \perp (T_1, T_2, L, \tilde{\mathbf{Z}})$ . Under the assumption of  $L \perp T_2 | (T_1, \tilde{\mathbf{Z}})$ , we have

$$\begin{aligned} &E \left\{ I(L \leq t_0)I(T_2 > t_0) \tilde{\mathbf{K}}(t_0) I[\log(T_2 - t_0) \leq \tilde{\mathbf{K}}^T(t_0)\mathbf{r}] \right\} \\ &= E \left\{ \tilde{\mathbf{K}}(t_0) P[L \leq t_0, T_2 > t_0, \log(T_2 - t_0) \leq \tilde{\mathbf{K}}^T(t_0)\mathbf{r} | \tilde{\mathbf{K}}^T(t_0)] \right\} \\ &= E \left\{ \tilde{\mathbf{K}}(t_0) P[L \leq t_0 | \tilde{\mathbf{K}}^T(t_0)] \times P[T_2 > t_0, \log(T_2 - t_0) \leq \tilde{\mathbf{K}}^T(t_0)\mathbf{r} | \tilde{\mathbf{K}}^T(t_0)] \right\} \\ &= E \left\{ \tilde{\mathbf{K}}(t_0) P[L \leq t_0 | \tilde{\mathbf{K}}^T(t_0)] \times P[\log(T_2 - t_0) \leq \tilde{\mathbf{K}}^T(t_0)\mathbf{r} | T_2 > t_0, \tilde{\mathbf{K}}(t_0)] \times P[T_2 > t_0 | \tilde{\mathbf{K}}(t_0)] \right\} \\ &= \tau E \left\{ \tilde{\mathbf{K}}(t_0) P[L \leq t_0 | \tilde{\mathbf{K}}^T(t_0)] \times P[T_2 > t_0 | \tilde{\mathbf{K}}(t_0)] \right\} \\ &= \tau E \left\{ \tilde{\mathbf{K}}(t_0) P[L \leq t_0, T_2 > t_0 | \tilde{\mathbf{K}}(t_0)] \right\} \\ &= \tau E \left\{ I(L \leq t_0)I(T_2 > t_0) \tilde{\mathbf{K}}(t_0) \right\}. \end{aligned}$$

It then follows that  $(I) = 0$ .



## Web Appendix B: Additional Results from Numerical Studies

### 2.1 A numerical example comparing the proposed method with the copula modeling approach

We conduct simulation studies to compare the proposed method with the classic copula modeling approach. Specifically, we generate  $T_1$  and  $T_2$  as follows:

0. Set  $n = 0$ .
1. Generate a *Bernoulli*(0.5) random variate  $W$
2. If  $W = 0$ , then keep generating  $\log(T_1)$  from  $N(0, 0.4)$  distribution and  $T_2$  as  $\log(T_2) = 0.2 + 0.4 \log(T_1) + \epsilon_1$  until  $T_2 > 1.4$ , where  $\epsilon_1$  is a  $N(0, 0.3)$  random error. Take the  $(T_1, T_2)$  with  $T_2 > 1.4$ .  
If  $W = 1$ , then keep generating  $T_1$  from  $N(0, 0.3)$  distribution and  $T_2$  as  $\log(T_2) = 0.3 - 1.4 \log(T_1) + \epsilon_2$  until  $T_2 \leq 1.4$ , where  $\epsilon_2$  is a  $N(0, 0.2)$  random error. Take the  $(T_1, T_2)$  with  $T_2 \leq 1.4$ .
3. Increase  $n$  by 1.
4. Go back to steps 1-3 unless  $n$  equals the specified sample size.

By this data generate scheme, we have  $T_1$  and  $T_2$  are negatively associated when  $T_2$  is small (i.e.  $T_2 \leq 1.4$ ) but are positively associated when  $T_2$  is large (i.e.  $T_2 > 1.4$ ). In addition, we generate  $C$  with  $\log C$  following *Unif*(-0.2, 2) distribution. Figure S1 presents the scatter plots for  $(T_1, T_2)$  and  $(T_1 \wedge T_2, T_2)$  based on one randomly selected simulated dataset of size 1000.

We first apply Fine et al. (2001)'s method to this simulated dataset, assuming a Clayton's copula model for the dependence structure between  $T_1$  and  $T_2$ . We obtain a copula parameter estimate, 0.96, with 95% CI, (0.83, 1.08). This result suggests the independence between  $T_1$  and  $T_2$  (in the upper wedge), which clearly contradicts with the true relationship between  $T_1$  and  $T_2$ . We examine 499 other simulated datasets, based on 467 of which, the application

of Fine et al. (2001)’s method leads to the same conclusion that  $T_1$  and  $T_2$  are independent (in the upper wedge).

[Figure 1 about here.]

We then apply the proposed method to the same simulated dataset shown in Figure S1. The true  $LCQRR(\tau; t_0)$  and the estimated  $LCQRR(\tau; t_0)$  (along with the corresponding 95% confidence intervals) are presented in Figure S2. We can see that the proposed method allow us to effectively utilize the observed data of  $(X, Y)$  to identify the positive dependence between  $T_1$  and  $T_2$  associated with large  $T_2$ . With small  $t_0$  (e.g.  $t_0 < 1$ ) and small  $\tau$  (e.g.  $\tau = 0.25$ ), our measure  $LCQRR(\tau; t_0)$  can also partially capture the negative dependence associated with small  $T_2$ .

[Figure 2 about here.]

As suggested by this example, existing modeling approaches that assume constant dependence between  $T_1$  and  $T_2$  may only reveal an overall average dependence, which can lead to misleading conclusions when the constant dependence assumption is violated. In contrast, the proposed new dependence measure entails a sensible approach to uncovering interesting dynamic patterns in the dependence structure without involving strong model assumptions.

## 2.2 Additional results for numerical studies in Section 5

Figure S3 presents the simulation results for Scenario 2 on the estimation of  $LCQRR(\tau; t_0)$ .

[Figure 3 about here.]

Table 1 reports the simulation results on the second stage inference for  $LCQRR(\tau; t_0)$  over  $\tau$ .

[Table 1 about here.]

Figure S4 plots the estimated  $LCQRR(\tau; t_0)$  along with 95% pointwise confidence intervals for fixed  $t_0$  values based on the Denmark diabetes registry data.

[Figure 4 about here.]

Figure S5 plots the estimated  $\gamma_0^{(4)}(\tau, t_0)$  along with 95% pointwise confidence intervals for fixed  $t_0$  values based on the Denmark diabetes registry data.

[Figure 5 about here.]

### 2.3 Sample code

A sample code for implementing the proposed method can be found at

<http://web1.sph.emory.edu/users/lpeng/Rpackage.html>.

## References

- Alexander, K. (1984). Probability inequalities for empirical processes and a law of the iterated logarithm. *The Annals of Probability* **12**, 1041–1067.
- Fine, J. P., Jiang, H., and Chappell, R. (2001). On semi-competing risks data. *Biometrika* **88**, 907–919.
- Lai, T. and Ying, Z. (1988). Stochastic integrals of empirical-type processes with applications to censored regression. *Journal of Multivariate Analysis* **27**, 334–358.
- Peng, L. and Fine, J. P. (2009). Competing risks quantile regression. *Journal of the American Statistical Association* **104**, 1140–1453.
- Pepe, M. S. (1991). Inference for events with dependent risks in multiple endpoint studies. *Journal of the American Statistical Association* **86**, 770–778.
- Van der Vaart, A. and Wellner, J. (1996). *Weak Convergence and Empirical Processes: with Applications to Statistics*. Springer Verlag, New York.

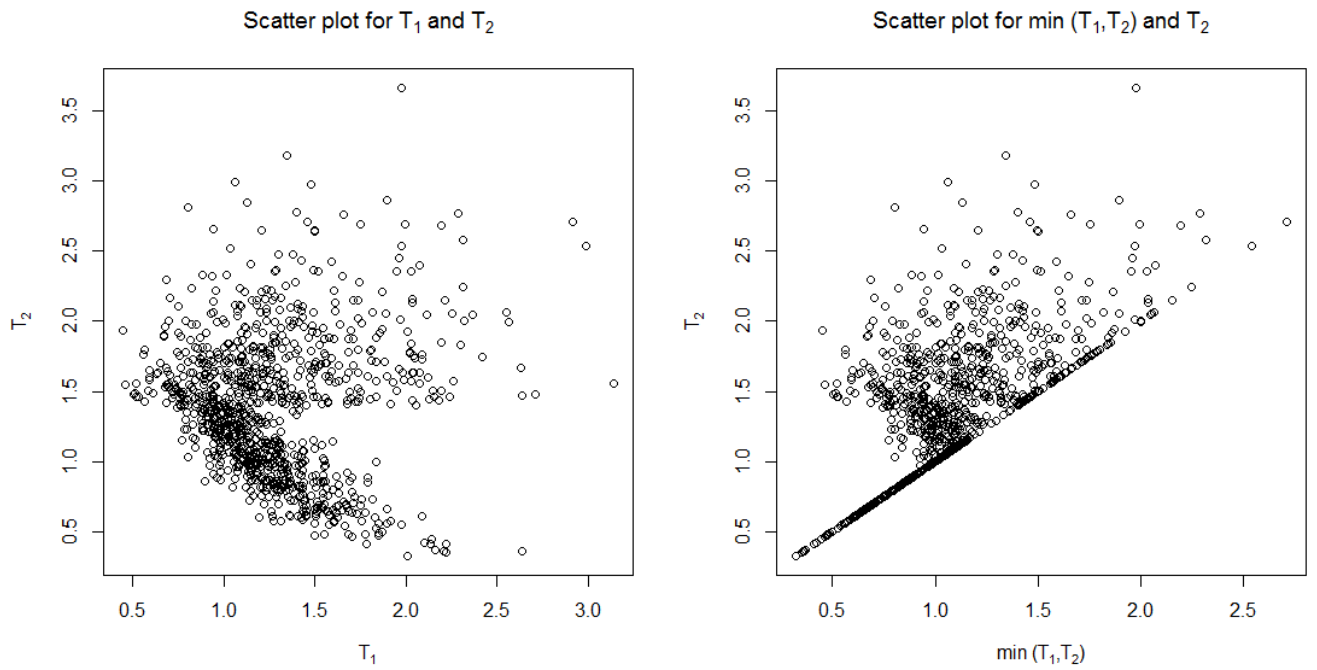

**Figure S1.** A simulated data example: scatter plots for  $(T_1, T_2)$  and  $(T_1 \wedge T_2, T_2)$  based on one simulated dataset of size 1000.

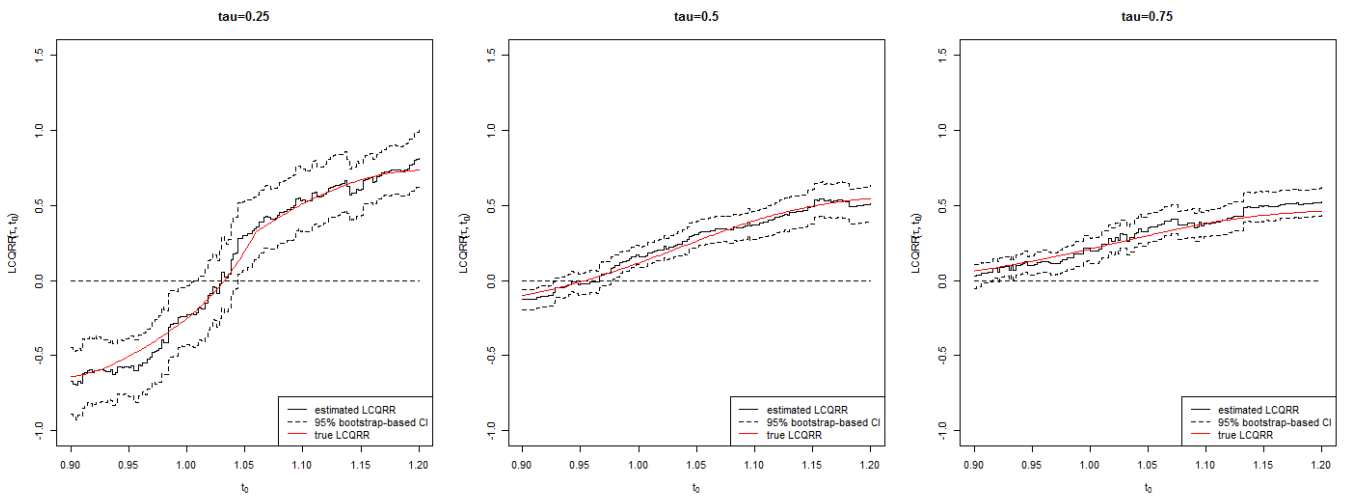

**Figure S2.** A simulated data example: estimated  $LCQRR(\tau; t_0)$  (black line), true value of  $LCQRR(\tau; t_0)$  (red line) and 95% Wald-type bootstrapping CI (dashed line).

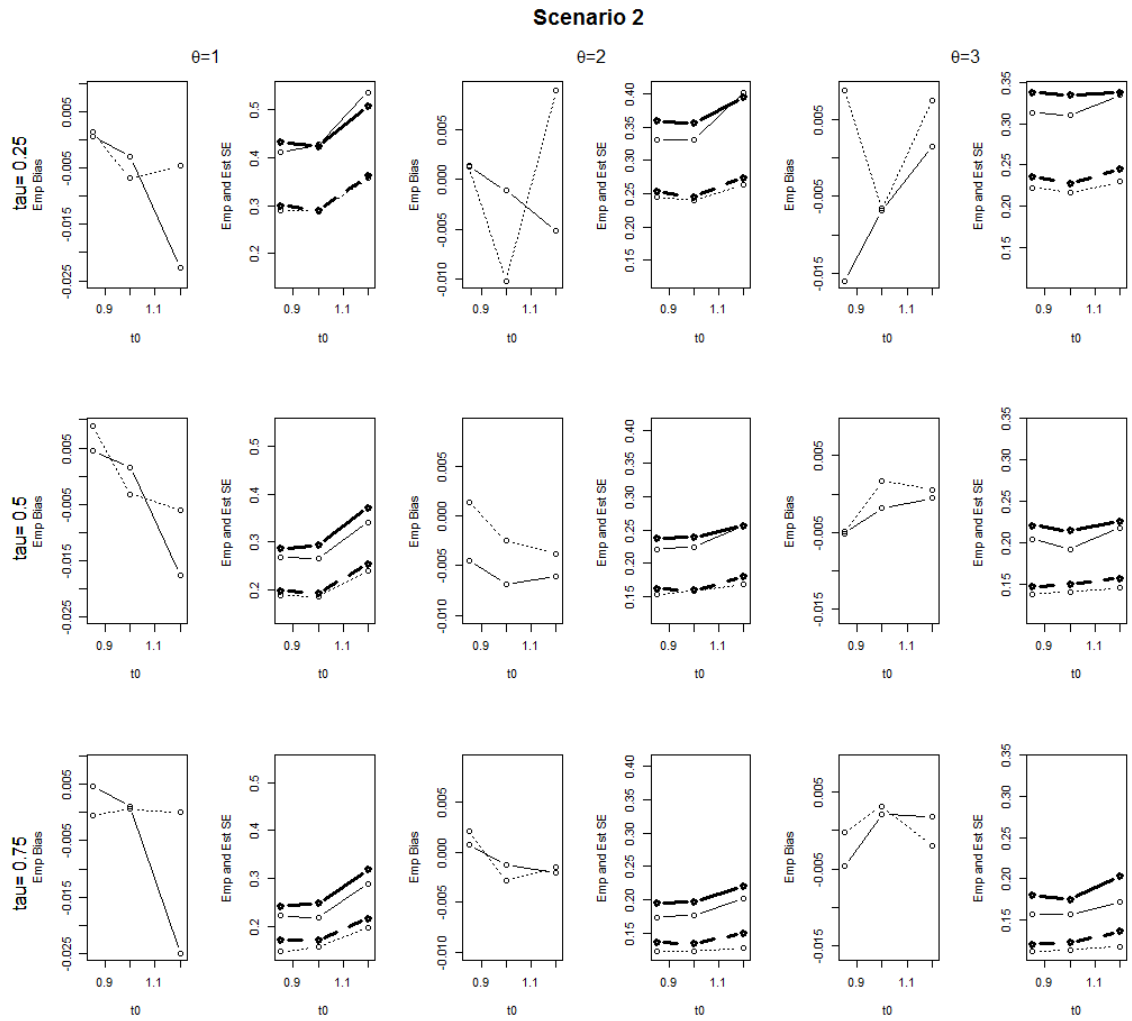

**Figure S3.** Simulation results for Scenario 2: Empirical bias (EmpBias), empirical standard error (EmpSE) and average estimated standard error (EstSE) of the proposed estimator of  $LCQRR$ . EmpBias for  $n = 200$  and that for  $n = 400$  are plotted in solid lines and dotted lines respectively. EmpSE and EstSE for  $n = 200$  are plotted in solid lines and bold solid lines respectively. EmpSE and EstSE for  $n = 200$  are plotted in dotted lines and bold dashed lines respectively.

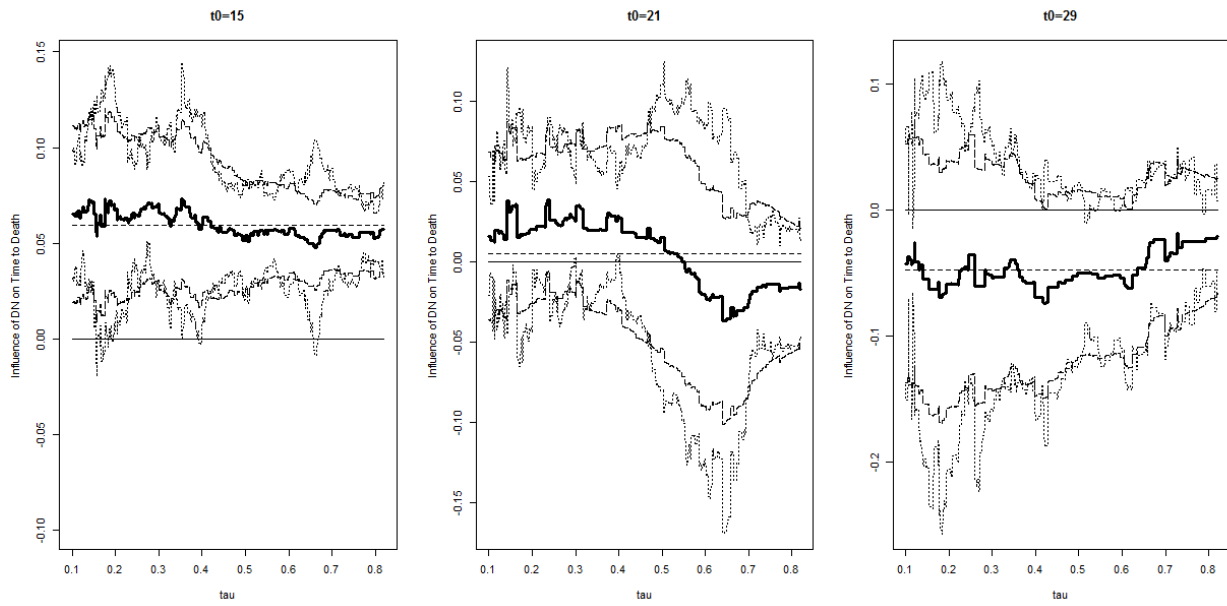

**Figure S4.** Denmark Diabetes Registry Study: Estimated  $LCQRR(\tau; t_0)$  (bold solid lines), corresponding 95% pointwise confidence intervals (dotted lines), 95% pointwise Wald-type bootstrapping confidence intervals (long-dashed lines), and overall influence of DN over  $\tau$  (horizontal dashed lines)

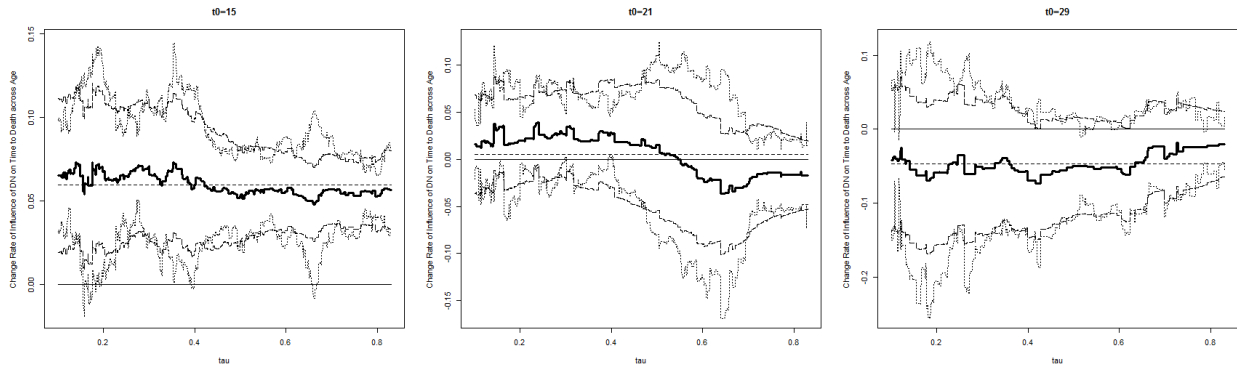

**Figure S5.** Denmark Diabetes Registry Study: Estimated  $\gamma_0^{(4)}(\tau, t_0)$  (bold solid lines), the corresponding 95% pointwise confidence intervals (dotted lines) and 95% pointwise Wald-type bootstrapping confidence intervals (long-dashed lines), and the overall influence of DN across time (horizontal dashed lines).



**Table 1**

Empirical biases, empirical standard errors and average standard errors estimates of  $\hat{\Omega}_{t_0}$  and empirical rejection rates for  $H_{03}$  and  $H_{04}$ .

| $\theta$                             | $t_0$ | n   | EmpBias | $\hat{\Omega}_{t_0}$<br>EmpSE | EstSE | $H_{03}$<br>EmpRR | $H_{04}$<br>EmpRR |
|--------------------------------------|-------|-----|---------|-------------------------------|-------|-------------------|-------------------|
| Scenario 1<br>$\tau \in [0.1, 0.87]$ |       |     |         |                               |       |                   |                   |
| 1                                    | 0.55  | 200 | 0.006   | 0.193                         | 0.195 | 0.060             | 0.041             |
|                                      |       | 400 | 0.004   | 0.128                         | 0.134 | 0.043             | 0.047             |
|                                      | 0.84  | 200 | 0.006   | 0.197                         | 0.201 | 0.052             | 0.036             |
|                                      |       | 400 | 0.001   | 0.144                         | 0.141 | 0.054             | 0.046             |
|                                      | 1.10  | 200 | 0.005   | 0.262                         | 0.247 | 0.061             | 0.050             |
|                                      |       | 400 | 0.002   | 0.175                         | 0.174 | 0.052             | 0.054             |
| 2                                    | 0.55  | 200 | 0.018   | 0.205                         | 0.211 | 0.575             | 0.051             |
|                                      |       | 400 | 0.007   | 0.139                         | 0.144 | 0.893             | 0.069             |
|                                      | 0.84  | 200 | 0.018   | 0.221                         | 0.219 | 0.791             | 0.092             |
|                                      |       | 400 | 0.006   | 0.153                         | 0.152 | 0.982             | 0.139             |
|                                      | 1.10  | 200 | -0.005  | 0.269                         | 0.274 | 0.697             | 0.053             |
|                                      |       | 400 | -0.004  | 0.191                         | 0.193 | 0.955             | 0.091             |
| 3                                    | 0.55  | 200 | 0.017   | 0.220                         | 0.216 | 0.918             | 0.072             |
|                                      |       | 400 | 0.001   | 0.146                         | 0.149 | 0.999             | 0.154             |
|                                      | 0.84  | 200 | -0.005  | 0.223                         | 0.225 | 0.984             | 0.126             |
|                                      |       | 400 | 0.006   | 0.156                         | 0.157 | 1.000             | 0.292             |
|                                      | 1.10  | 200 | 0.000   | 0.302                         | 0.310 | 0.908             | 0.051             |
|                                      |       | 400 | -0.001  | 0.214                         | 0.216 | 0.997             | 0.114             |
| Scenario 2<br>$\tau \in [0.1, 0.9]$  |       |     |         |                               |       |                   |                   |
| 1                                    | 0.85  | 200 | 0.003   | 0.244                         | 0.236 | 0.066             | 0.045             |
|                                      |       | 400 | 0.003   | 0.167                         | 0.164 | 0.052             | 0.047             |
|                                      | 1.00  | 200 | 0.004   | 0.242                         | 0.232 | 0.061             | 0.045             |
|                                      |       | 400 | 0.007   | 0.161                         | 0.164 | 0.052             | 0.047             |
|                                      | 1.20  | 200 | -0.009  | 0.303                         | 0.279 | 0.075             | 0.064             |
|                                      |       | 400 | -0.003  | 0.215                         | 0.203 | 0.073             | 0.060             |
| 2                                    | 0.85  | 200 | 0.002   | 0.204                         | 0.198 | 0.859             | 0.092             |
|                                      |       | 400 | 0.005   | 0.138                         | 0.139 | 0.992             | 0.180             |
|                                      | 1.00  | 200 | -0.012  | 0.188                         | 0.194 | 0.929             | 0.157             |
|                                      |       | 400 | 0.003   | 0.136                         | 0.137 | 1.000             | 0.314             |
|                                      | 1.20  | 200 | -0.007  | 0.220                         | 0.213 | 0.938             | 0.271             |
|                                      |       | 400 | 0.004   | 0.156                         | 0.151 | 0.997             | 0.426             |
| 3                                    | 0.85  | 200 | 0.010   | 0.185                         | 0.182 | 0.998             | 0.236             |
|                                      |       | 400 | 0.003   | 0.129                         | 0.128 | 1.000             | 0.492             |
|                                      | 1.00  | 200 | 0.003   | 0.178                         | 0.179 | 1.000             | 0.363             |
|                                      |       | 400 | -0.002  | 0.126                         | 0.126 | 1.000             | 0.664             |
|                                      | 1.20  | 200 | -0.007  | 0.187                         | 0.190 | 1.000             | 0.492             |
|                                      |       | 400 | 0.001   | 0.136                         | 0.134 | 1.000             | 0.837             |
